# Supplementary material
Source: publisher figshare collection journal article supplement (https://asha.figshare.com/articles/dataset/_/12735875)
Supplement: Supplementary file 1 [file 1]

**Supplemental Material S1.** Pairwise comparisons for the speech-to-noise (SNR) model results.

| <b>Comparison</b>     | <b>Noise</b> | <b>Contrast</b>      | <b>Estimate</b> | <b>SE</b> | <b>df</b> | <b>t-ratio</b> | <b>p-value</b> |
|-----------------------|--------------|----------------------|-----------------|-----------|-----------|----------------|----------------|
| Within Devices        | NN vs. MN    | No Device            | 1.860           | 0.282     | 1371.989  | 6.603          | 0.000          |
|                       |              | Device A             | 3.950           | 0.287     | 1361.909  | 13.755         | 0.000          |
|                       |              | Device B             | 5.180           | 0.289     | 1366.862  | 17.897         | 0.000          |
|                       |              | Device C             | 12.070          | 0.296     | 1354.655  | 40.788         | 0.000          |
| No Device vs. Devices | NN           | No device – Device A | -4.750          | 0.581     | 27.531    | -8.183         | 0.000          |
|                       |              | No device – Device B | -7.610          | 0.513     | 29.781    | -14.838        | 0.000          |
|                       |              | No device – Device C | -29.320         | 1.134     | 23.129    | -25.867        | 0.000          |
|                       | MN           | No device – Device A | -2.660          | 0.592     | 29.785    | -4.496         | 0.002          |
|                       |              | No device – Device B | -4.300          | 0.524     | 32.327    | -8.206         | 0.000          |
|                       |              | No device – Device C | -19.110         | 1.139     | 23.580    | -16.785        | 0.000          |
| Across Devices        | NN           | Device A – Device B  | -2.860          | 0.694     | 26.039    | -4.123         | 0.007          |
|                       |              | Device A – Device C  | -24.570         | 1.300     | 22.941    | -18.895        | 0.000          |
|                       |              | Device B – Device C  | -21.710         | 0.909     | 23.582    | -23.884        | 0.000          |
|                       | MN           | Device A – Device B  | -1.640          | 0.702     | 27.172    | -2.335         | 0.312          |
|                       |              | Device A – Device C  | -16.450         | 1.304     | 23.242    | -12.613        | 0.000          |
|                       |              | Device B – Device C  | -14.810         | 0.914     | 24.110    | -16.206        | 0.000          |
