# Supplementary material
Source: publisher figshare collection journal article supplement (https://asha.figshare.com/articles/dataset/_/12735875)
Supplement: Supplementary file 2 [file 1]

**Supplemental Material S3.** Pairwise comparisons for the naïve listener intelligibility model results.

| Comparison               | Noise        | Contrast             | Estimate | SE    | df       | t-ratio | p-value |
|--------------------------|--------------|----------------------|----------|-------|----------|---------|---------|
| Within Devices           | NN vs.<br>MN | No Device            | 3.170    | 0.098 | 3691.001 | 32.198  | 0.000   |
|                          |              | Device A             | 2.160    | 0.099 | 3691.748 | 21.932  | 0.000   |
|                          |              | Device B             | 2.170    | 0.099 | 3691.428 | 22.013  | 0.000   |
|                          |              | Device C             | 0.210    | 0.101 | 3691.915 | 2.036   | 0.458   |
| No Device vs.<br>Devices | NN           | No device – Device A | -0.090   | 0.171 | 30.870   | -0.550  | 0.999   |
|                          |              | No device – Device B | -0.040   | 0.167 | 31.405   | -0.237  | 1.000   |
|                          |              | No device – Device C | -0.560   | 0.171 | 31.007   | -3.258  | 0.049   |
|                          | MN           | No device – Device A | -1.100   | 0.171 | 30.775   | -6.426  | 0.000   |
|                          |              | No device – Device B | -1.040   | 0.167 | 31.256   | -6.197  | 0.000   |
|                          |              | No device – Device C | -3.520   | 0.171 | 30.903   | -20.607 | 0.000   |
| Across Devices           | NN           | Device A – Device B  | 0.050    | 0.169 | 31.142   | 0.320   | 1.000   |
|                          |              | Device A – Device C  | -0.460   | 0.157 | 33.601   | -2.946  | 0.095   |
|                          |              | Device B – Device C  | -0.520   | 0.195 | 28.236   | -2.649  | 0.181   |
|                          | MN           | Device A – Device B  | 0.060    | 0.169 | 30.947   | 0.354   | 1.000   |
|                          |              | Device A – Device C  | -2.420   | 0.157 | 33.400   | -15.440 | 0.000   |
|                          |              | Device B – Device C  | -2.480   | 0.195 | 28.096   | -12.730 | 0.000   |
