# Supplementary material
Source: publisher figshare collection journal article supplement (https://asha.figshare.com/articles/dataset/_/12735875)
Supplement: Supplementary file 3 [file 1]

**Supplemental Material S2.** Pairwise comparisons for the familiar listener intelligibility model results.

| <b>Comparison</b>     | <b>Noise</b> | <b>Contrast</b>      | <b>Estimate</b> | <b>SE</b> | <b>df</b> | <b>t-ratio</b> | <b>p-value</b> |
|-----------------------|--------------|----------------------|-----------------|-----------|-----------|----------------|----------------|
| Within Devices        | NN vs. MN    | No Device            | 2.230           | 0.185     | 877.078   | 12.080         | 0.000          |
|                       |              | Device A             | 1.020           | 0.184     | 875.746   | 5.548          | 0.000          |
|                       |              | Device B             | 0.880           | 0.184     | 875.746   | 4.808          | 0.000          |
|                       |              | Device C             | 0.410           | 0.184     | 876.222   | 2.212          | 0.346          |
| No Device vs. Devices | NN           | No device – Device A | 0.140           | 0.222     | 49.623    | 0.614          | 0.999          |
|                       |              | No device – Device B | -0.120          | 0.214     | 53.656    | -0.562         | 0.999          |
|                       |              | No device – Device C | -0.420          | 0.262     | 37.521    | -1.617         | 0.738          |
|                       | MN           | No device – Device A | -1.070          | 0.223     | 50.221    | -4.821         | 0.000          |
|                       |              | No device – Device B | -1.470          | 0.215     | 54.338    | -6.818         | 0.000          |
|                       |              | No device – Device C | -2.250          | 0.263     | 37.995    | -8.534         | 0.000          |
| Across Devices        | NN           | Device A – Device B  | -0.260          | 0.196     | 68.688    | -1.310         | 0.892          |
|                       |              | Device A – Device C  | -0.560          | 0.296     | 32.861    | -1.897         | 0.563          |
|                       |              | Device B – Device C  | -0.300          | 0.274     | 35.607    | -1.107         | 0.951          |
|                       | MN           | Device A – Device B  | -0.390          | 0.196     | 68.688    | -2.004         | 0.487          |
|                       |              | Device A – Device C  | -1.170          | 0.296     | 32.972    | -3.965         | 0.008          |
|                       |              | Device B – Device C  | -0.780          | 0.275     | 35.746    | -2.839         | 0.117          |
